# Supplementary material for: Depletion of Gangliosides Enhances Articular Cartilage Repair in Mice
Source: PubMed Central journal article supplement (PMC5333092; doi:10.1038/srep43729), 2017-03-02
Supplement: srep43729-s1.pdf [file srep43729-s1.pdf]

1                    **Depletion of Gangliosides Enhances Articular Cartilage Repair in Mice**

2                    Masatake Matsuoka<sup>1</sup>, MD, PhD; Tomohiro Onodera<sup>1,\*</sup>, MD, PhD; Kentaro Homan<sup>1</sup>, MS, RPT;

3                    Fumio Sasazawa<sup>1</sup>, MD, PhD; Jun-ichi Furukawa<sup>1</sup>, PhD; Daisuke Momma<sup>1</sup>, MD, PhD;

4                    Rikiya Baba<sup>1</sup>, MD; Kazutoshi Hontani<sup>1</sup>, MD; Zenta Joutoku<sup>1</sup>, MD; Shinji Matsubara<sup>1</sup>, MD;

5                    Tadashi Yamashita<sup>2</sup>, DVM, PhD; Norimasa Iwasaki<sup>1</sup>, MD, PhD

6                    <sup>1</sup>Department of Orthopaedic Surgery, Hokkaido University Graduate School of Medicine, Sapporo,

7                    Japan

8                    <sup>2</sup>Laboratory of Biochemistry, Azabu University, Graduate School of Veterinary Medicine,

9                    Sagamihara, Japan

10

11

12 **Supplemental figure legends**

13

14 Supplemental Figure 1. Quantitative analysis of GSL-glycans in cultured mouse chondrocytes.

15

16 Supplemental Figure 2. Eight weeks postoperative in 8-week-old mice. Histology of articular  
17 cartilage repair (A-D) and the articular cartilage repair score (E). Sections from WT (A-B) and  
18 GM3<sup>-/-</sup> mice (C-D) were stained with hematoxylin & eosin or Safranin-O. The scale bar shows 100  
19 μm. All values are expressed as the mean ± SEM. (\*\*P < 0.01).

20

21 Supplemental Figure 3. Proliferation assay. A) MSCs, B) chondrocytes. The number of viable cells  
22 quantified by measuring the absorbance at 450 nm. All values are expressed as the mean ± SEM.

23

24 Supplemental Figure 4. Wound healing assay. A) MSCs, B) chondrocyte. The migration rate was  
25 calculated as the reduced area that remained cell free between both borderlines following scratching.  
26 All values are expressed as the mean ± SEM.

27

28 Supplemental Figure 5. Quantitative real-time reverse transcription-polymerase chain reaction  
29 analysis of MSCs. (A) type II collagen mRNA, (B) aggrecan mRNA, (C) type X collagen mRNA,  
30 (D) Runx2 mRNA, (E) Runx3 mRNA, (F) Ihh mRNA. All values are expressed as the mean ± SEM.  
31 (\*\*P < 0.01). Flow cytometry analysis of MSCs (G-L). The expression of each antigen (red) is  
32 shown together with the corresponding isotype control (blue). Numbers indicate the percentage of  
33 cells in the indicated regions. FACS results show that these cells are homogenously positive for the  
34 mesenchymal marker CD29 (G, J) but negative for the hematopoietic marker CD45 (H, K) and co-  
35 stimulating molecule CD86 (I, L).

36

37 Supplemental Figure 6. Measurement of the articular cartilage repair site in 4-week-old mice at 8  
38 weeks postoperative. All values are expressed as the mean  $\pm$  SEM.

39

40 Supplemental Table 1. Gene-specific primers used for real-time PCR analysis.

Supplemental Figure 1

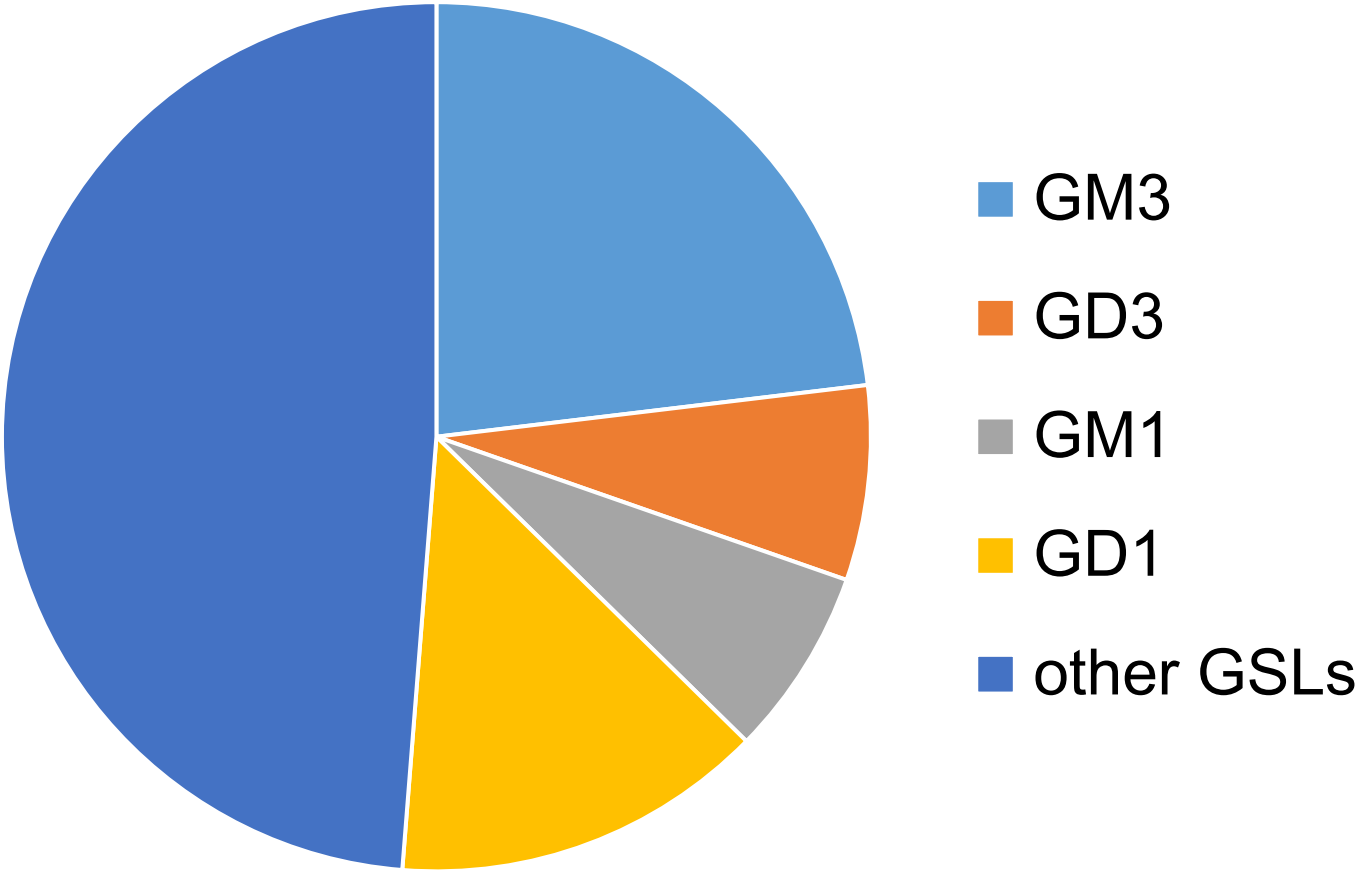

Supplemental Figure 2

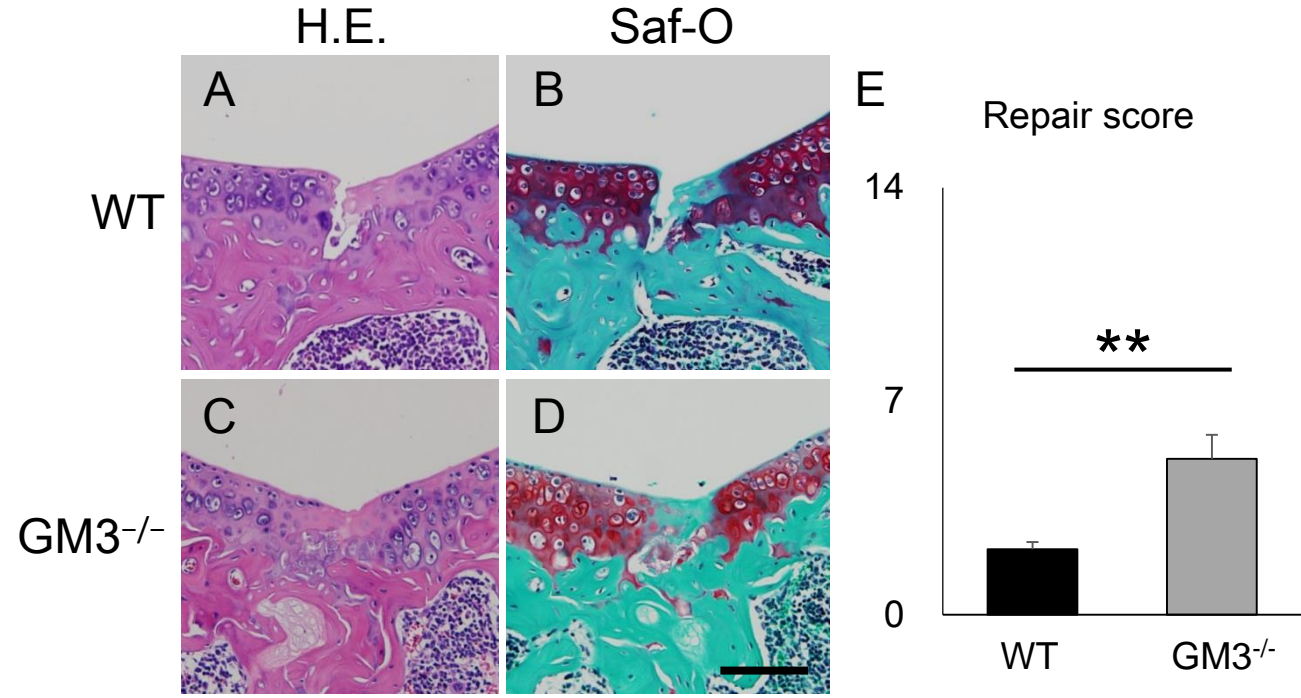

Supplemental Figure 3

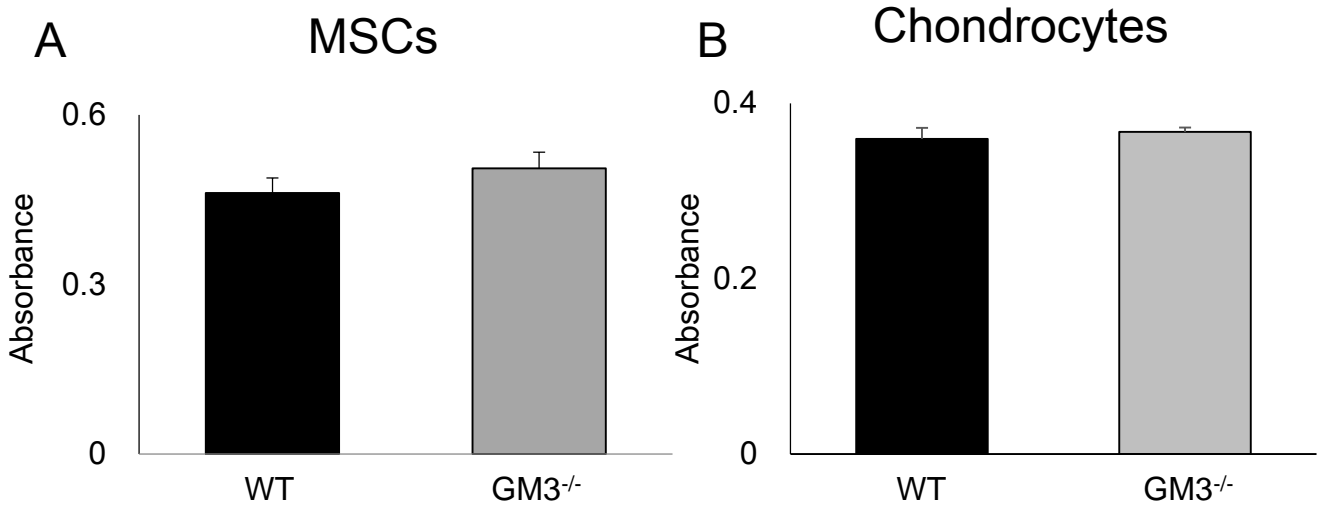

Supplemental Figure 4

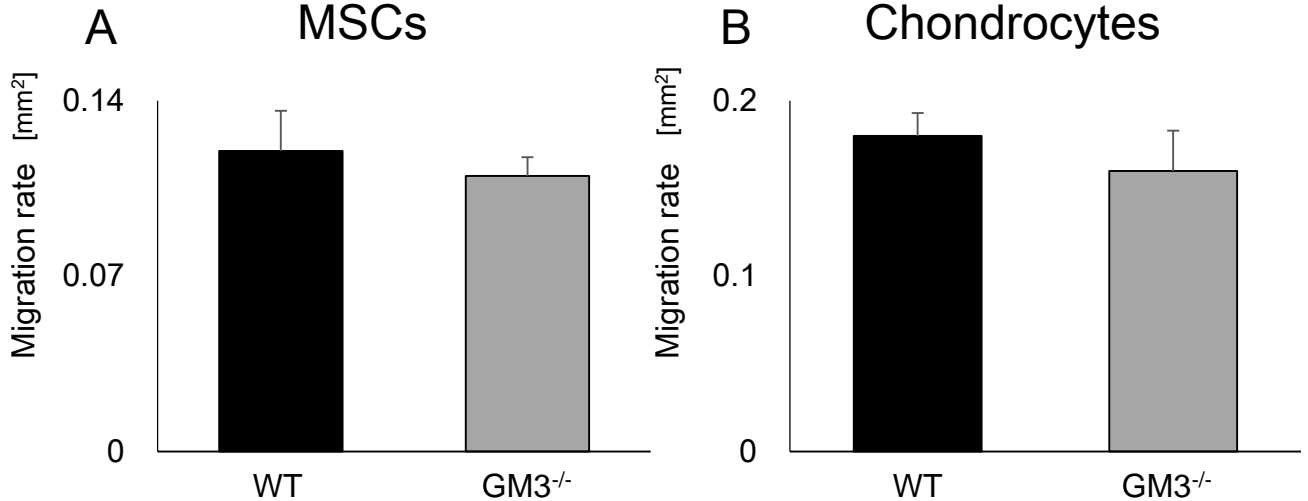

Supplemental Figure 5

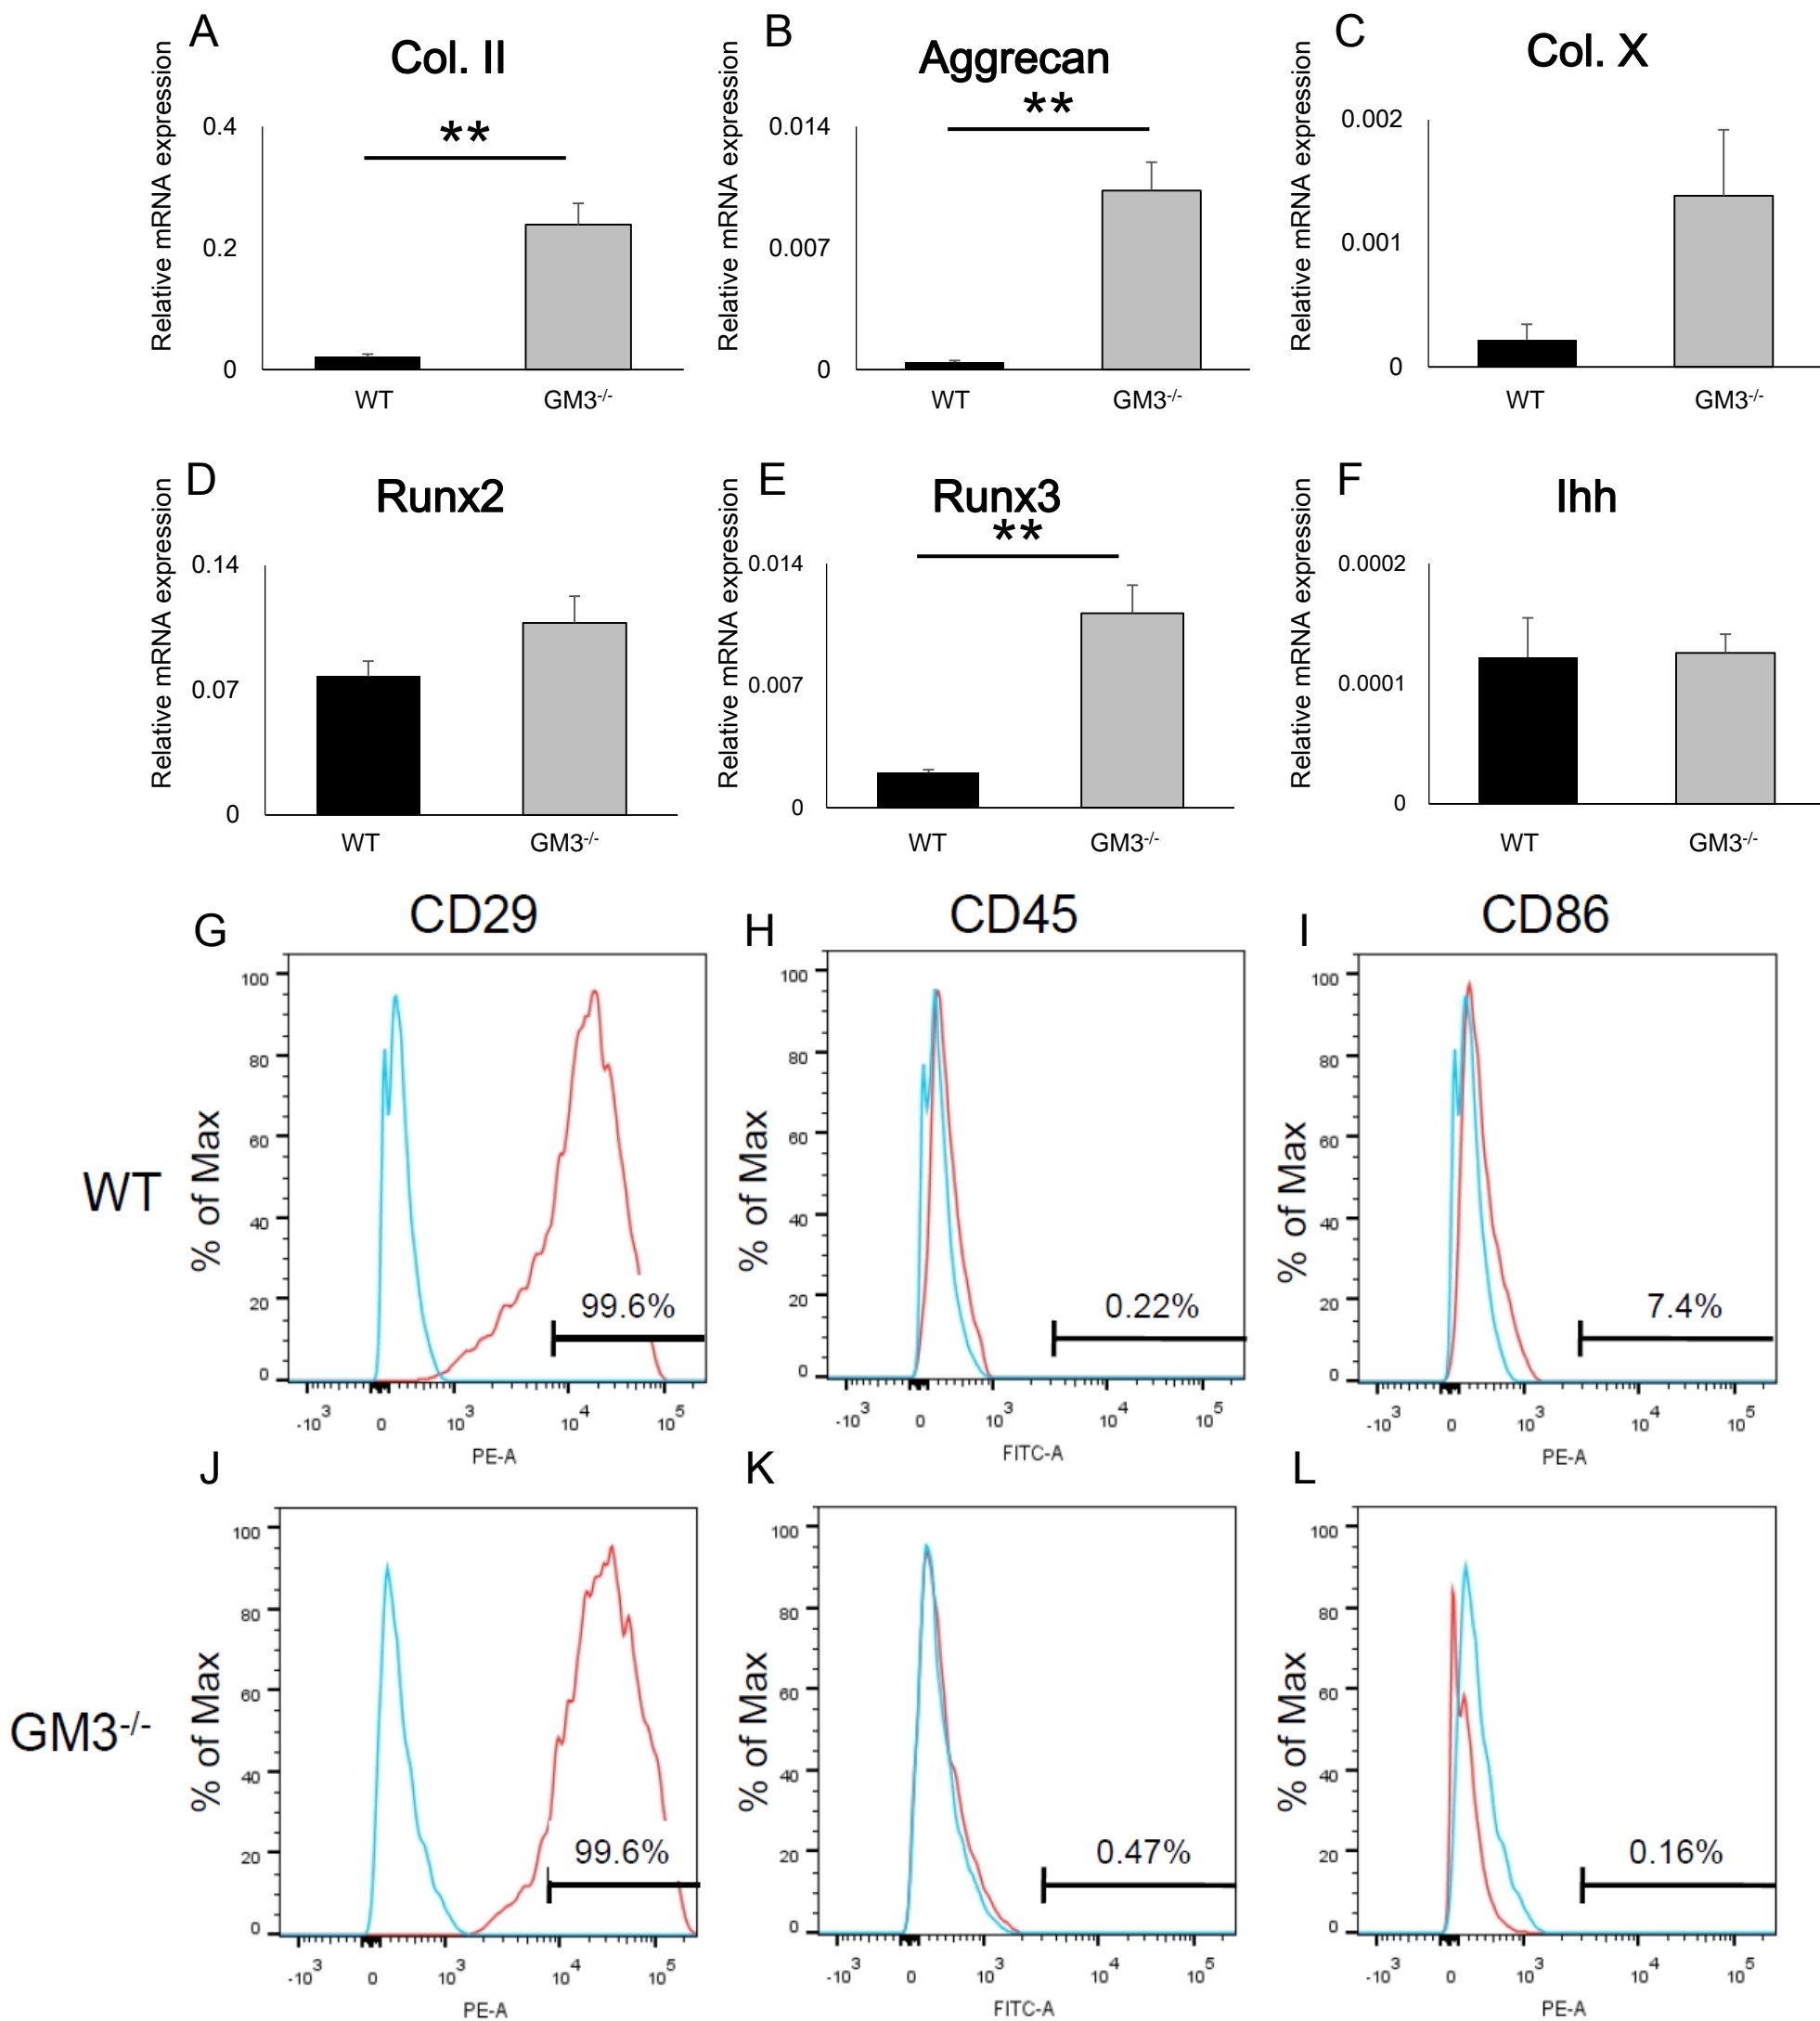



Supplemental Figure 6

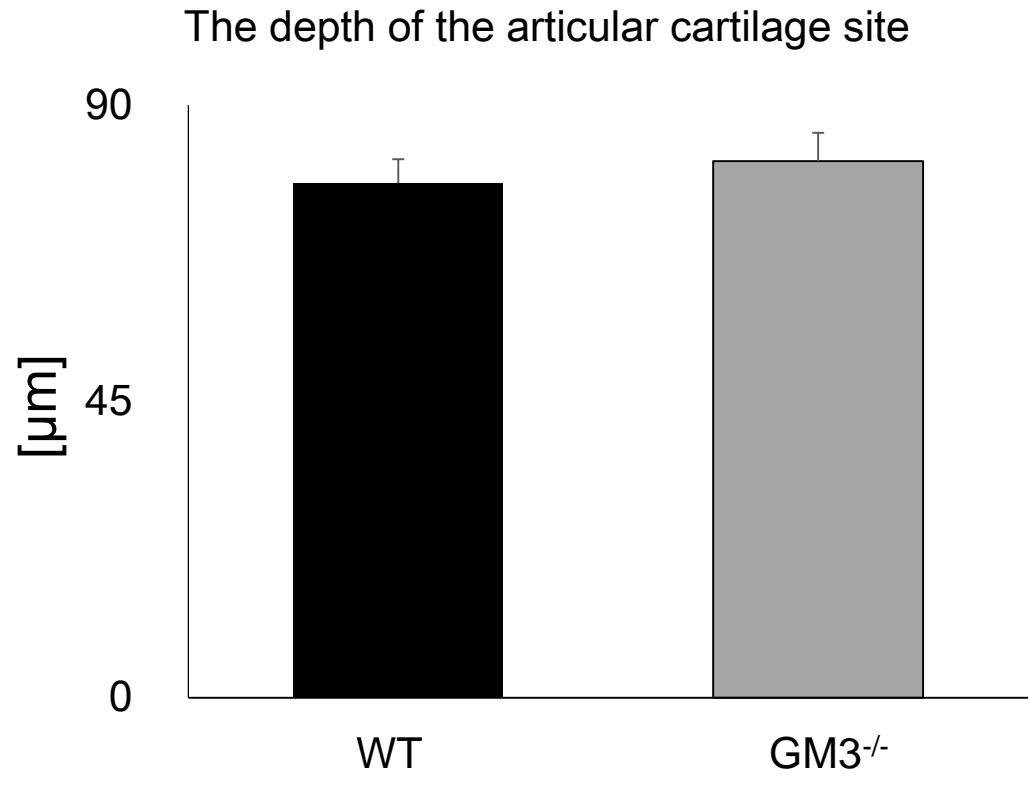

Supplemental Table 1

| <b>Gene</b>             | <b>Sequence</b> |                          |
|-------------------------|-----------------|--------------------------|
| <i>Type II collagen</i> | Forward         | AGGATGGCTGCACCAAACAC     |
|                         | Reverse         | TGTCCATGGGTGCGATGTC      |
| <i>Type X collagen</i>  | Forward         | AGCCCCAAGACACAATACTTCATC |
|                         | Reverse         | TTTCCCCTTTCCGCCCATTCACAC |
| <i>Aggrecan</i>         | Forward         | CCCTCACCCCAAGAATCAAG     |
|                         | Reverse         | GGATAGTTGGGGAGCGACAC     |
| <i>Runx2</i>            | Forward         | GATGGGACTGTGGTTACCG      |
|                         | Reverse         | GGTGAAACTCTTGCCTCGTC     |
| <i>Runx3</i>            | Forward         | CAGGTTCAACGACCTTCGATT    |
|                         | Reverse         | GTGGTAGGTAGCCACTTGGG     |
| <i>Inh</i>              | Forward         | CTCTTGCCTACAAGCAGTTCA    |
|                         | Reverse         | CCGTGTTCTCCTCGTCCTT      |
| <i>GM3 synthase</i>     | Forward         | ATGCCAAGTGAGTTCACCTCT    |
|                         | Reverse         | ACTCAAATGCAACCAACGTG     |
| <i>GAPDH</i>            | Forward         | ACTTTGTCAAGCTCATTTCC     |
|                         | Reverse         | TGCAGCGAACTTTATTGATG     |
